# Supplementary material
Source: PubMed Central journal article supplement (PMC5209639)
Supplement: jnm181792SupplementaryTable1.pdf [file jnm181792SupplementaryTable1.pdf]

(-)- $\beta$ -2',3'-Dideoxy-5-fluoro-3'-thiacytidine, [2-14C]-  
(+)- $\alpha$ -Tocopherol acetate [acetyl-1-14C]  
(+)-Dihydrotetrabenazine, [O14CH3]  
( $\pm$ )-1,2-Butanediol [1-14C]  
( $\pm$ )-7-Hydroxy(dipropylamino)tetralin, [3H]  
( $\pm$ )-Menthol, [1-3H]  
(2-Bromoethyl)trimethylammonium bromide, [ethyl-1,2-14C]-  
(4-Ethoxyphenyl)-N-t-butylnitron, [14C]-  
(6S)-Leucovorine, diammonium salt, [3', 5', 7, 9-3H]  
(6S)-Methyltetrahydrofolic acid, [3', 5', 7, 9-3H]  
(a,a,a-Trifluoro-o-tolyl) acetic acid [1-14C]  
(E,E)-8,10-Dodecadien-1-ol, [1-3H]  
(R)-(-)-1-(4-Bromophenyl)ethylamine  
(R)-(-)-2-Amino-1-propanol [D-alaninol-1-14C]  
(R)-(-)-N-Propylnorapomorphine, [propyl-2, 3-3H]  
(R)-(+)-Methanandamide [1-14C]  
(R)-2-Amino-4-methylpentanoic acid, [1-14C]  
(R)-9-(2-Phosphonylmethoxypropyl)-adenine, [adenine-8-14C]-  
(R)-Amlodipine, malic acid salt, [dihydropyridine-4-14C]-  
(R)-Methylbenzylamine hydrochloride, [methyl-14C]-  
(R)-Warfarin, [4-phenyl-3H]-  
(R,S)-Mevalonic acid, DBED salt, [2-14C]  
(RL)-Propamocarb 3-[dimethylaminopropylamine-1-14C] hydrochloride  
(S)-DDMS, tartaric acid salt, [butylamine-1-14C]-  
[Carbomethoxymethylene] triphenyl phosphorane  
1-(2-Deoxy-2-fluoro- $\beta$ -D-arabinofuranosyl)-5-iodouracil  
1-(2-Deoxy-2-fluoro- $\beta$ -D-arabinofuranosyl)-5-methyluracil, [2-14C]-  
1-(4-Methoxybenzyl)-1H-Pyrazole-4-carboxylic  
1,1,2,2-Tetrachloroethane [1,2-14C]  
1,1,2,2-Tetrachloroethylene [1,2-14C]  
1,1\ Carbonyldiimidazole [carbonyl-14C]  
1,12-Dodecanedioic acid [carboxyl-14C]  
1,12-Dodecanediol [1,2-14C]  
1,1-Dimethylurea [carbonyl-14]  
1,1-Diphenylacetone [ring-14C(U)]  
1,2,3,4,7-Pentachlorodibenzo-p-dioxin tetrachlorophenyl [ring-14C(U)]  
1,2,3,4-Tetrahydronaphthalene [ring-14C(U)]  
1,2,3-Triazole [14C]  
1,2,3-Trichlorobenzene [ring-14C(U)]  
1,2,4 Triazole-3-thiol [5-14C]  
1,2,4,5-Tetrachlorobenzene [14C(U)]  
1,2,4-Trichlorobenzene [14C(U)]  
1,2-Benzene dimethanol [ring-14C]  
1,2-Dichloro-4-nitrobenzene [14C(U)]  
1,2-Dichlorobenzene [14C(U)]  
1,2-Dichloroethane [1,2-14C]  
1,2-Dichloroethylene, (cis,trans) [1,2-14C]

1,2-Dichloropropane, [1-14C]-  
1,2-Diheptanoyl-sn-glycero-3-phosphocholine  
1,2-Dioctanoyl [1-14C] rac-glycerol  
1,2-Dioleoyl-rac-glycerol [14C(U)]  
1,2-Phenylene diamine [14C(U)]  
1,2-Phosphatidylcholine, L- $\alpha$ -diarachidonyl  
1,2-Propanediol dinitrate [1-14C]  
1,3,4,6,7,8-Hexahydro-4,6,6,7,8,8-hexamethylcyclohexan-2-ylidene-2-benzopyran, [3-14C]-  
1,3,5-Tribromobenzene, [14C(U)]-  
1,3,5-Triethylhexahydro-s-triazine  
1,3,5-Trinitrobenzene [14C(U)]  
1,3,7-Trimethylxanthine, [1-methyl-14C]-  
1,3-Diacetamidobenzene, [ring-14C(U)]-  
1,3-Diaminopropane [1,3-14C] dihydrochloride  
1,3-Dibromopropane, [1-14C]  
1,3-Dicaprins [carboxyl-14C]  
1,3-Dichloroacetone [2-14C]  
1,3-Dichloropropan-2-ol [2-14C]  
1,3-Dichloropropane, [2-14C]-  
1,3-Dicyanobenzene [ring-14C(U)]  
1,3-Dicyclohexylcarbodiimide [14C]  
1,3-Dimethoxybenzene [ring-14C(U)]  
1,3-Dimethyl-2-thiourea [2-14C]  
1,3-Dimethylxanthine, [8-14C]-  
1,3-Dinitrobenzene [14C(U)]  
1,3-Dioleoylglycerol [oleoyl-1-14C]  
1,3-Propanediol [2-14C]  
1,4-Butanediol [1,4-14C]  
1,4-Dibromobenzene, [ring-14C(U)]-  
1,4-Dibutyl terephthalic acid [1,4-14C]  
1,4-Dichlorobenzene [14C(U)]  
1,4-Dihydroxynaphthalene [ring-14]  
1,4-Dimethylnaphthalene, [1,4,5,8-14C]-  
1,4-Dioxane [14C(U)]  
1,4-Phenylene diamine [ring-14C(U)]  
1,6-Hexanediamine [1,6-14C] dihydrochloride  
1,6-Hexanediol [1,6-14C]  
1-[1-(4-Chlorophenyl)-cyclobutyl]-3-methyl-butylamine, [butylamine-1-14C]-  
11-Deoxycortisol [4-14C]  
12(S)-HEPE [1-14C]  
13(S)-HODE [1-14C]  
13(S)-HpODE [1-14C]  
15(S)-HEDE [1-14C]  
16 $\alpha$ -Bromo-3 $\beta$ -hydroxy-5 $\alpha$ -[4-14C] androstane-17-one  
17 $\alpha$ -Estradiol [4-14C]  
17 $\alpha$ -Octadecynoic acid [1-14C]  
17-Dimethylaminogeldanamycin, [methyl-14C]-

17-DMAG, [methyl-14C]-  
17-Hydroxywortmannin, [17-3H]  
1-Aminocyclobutane-1-carboxylic acid  
1-Aminocyclobutanecarboxylic acid, [carboxy-14C]-  
1-Aminocyclohexane-1-carboxylic acid  
1-Amino-cyclopropane-1-carboxylic acid,  
1-Arachidonyl [1-14C] 2-stearoyl glycerol  
1-BOC-4-Piperidone [carbonyl-14C]  
1-BOC-S-Prolinamide [1-14C]  
1-Bromo-3,5-dichlorobenzene [ring-14C(U)]  
1-Bromo-4-fluorobenzene, [14C (U)]  
1-Bromo-cyclobutanecarboxylic acid [1-14C]  
1-Bromododecane [1-14C]  
1-Bromohexane [1-14C]  
1-Bromooctane [1-14C]  
1-Chloro-2,4-dinitrobenzene [14C]  
1-Chloro-2-methylnaphthalene [8-14C]  
1-Chloro-3-nitrobenzene [14C(U)]  
1-Cyano-1H-1,2,3-benzotriazole [cyano-14C]  
1-Eicosanycyclohexane, [cyclohexane-1-14C]-  
1-Fluoro-2,4-dinitrobenzene [14C(U)]  
1-Fluoro-2-nitrobenzene [ring-14C]  
1-Fluoro-4-bromo benzene [ring-14C(U)]  
1H (3,5-Dimethylpyrazole)-1-carboximidine,  
1-Hexadecanol, n-[1-14C]  
1-Hexanol, [1-14C]  
1H-Pyrazolecarboximidine[carboximidine-14C]  
1-Indanone [1-14C]  
1-Iodoprop-1-yn-3-yl N-n-butylcarbamate  
1-Methyl [methyl-14C] indole  
1-Methyl-2-thiourea [2-14C]  
1-Methylxanthine [14C]  
1-Mono oleoyl [1-14C] rac glycerol  
1-Naphthylacetic acid [carboxyl-14C]  
1-Nitronaphthalene, [1,4,5,8-14C]-  
1-Nitropropane, [1-14C]-  
1-Octanethiol [1-14C]  
1-Oleoyl [1-14C] 2-arachidonyl glycerol  
1-O-Octadecyl-2-O-methyl-sn-glycero-3-phosphonofornate methyl ester, [carbonyl-14C]-  
1-Phenyl-2-trimethylsilylacetylene, [acetylene-1, 2-14C]  
1-Piperidinecarbonyl chloride, [carbonyl-14C]-  
1-Vinyl-2-pyrrolidone [5-14C]  
2,2,3-Trifluoro-3-(1,1,2,2,3,3-heptafluoro-3-trifluoromethoxy-propoxy)-propionic acid, potassium salt, [propi  
2,2-Dichloroacetamide [1-14C]  
2,2-Dichloroethanol [1-14C]  
2,3,6-Trichloropyridine [2,6-14C]  
2,3-Benzofuran [2-14C]

2,3-Butadione, [2,3-14C]-  
2,3-Dichloroaniline, [ring-14C(U)]-  
2',3'-Dideoxyadenosine, [2',3',8-3H(N)]-  
2,3-Dihydroisoflavone, [2,3-3H]-  
2,4 Difluoroacetanilide, [14C]-  
2,4,5-Trichloronitrobenzene, [ring-14C(U)]-  
2,4,6-Trifluorophenylacetic acid, [7-14C]  
2,4,6-Trifluorophenylacetonitrile, [7-14C]  
2,4,6-Trinitrotoluene, [methyl-14C]-  
2,4-Diamino-6-nitrotoluene, [methyl-14C]-  
2,4-Diaminopyrimidine, [2-14C]-  
2,4-Diaminotoluene [ring-14C(U)]  
2,4-Dichlorobenzoic acid, [7-14C]  
2,4-Dichlorophenol, [14C(U)]-  
2,4-Diiodophenol [14C]  
2,4-Dimethoxyaniline [ring-14C(U)]  
2,4-Dimethylaniline, [ring-14C(U)]-  
2,4-Dimethylphenol [phenol ring-14C(U)]  
2,4-Dinitroaniline [14C(U)]  
2,4-Dinitroanisole [ring-14C(U)]  
2,4-Dinitrophenol [14C(U)]  
2,5-Dichloro-4-ethoxybenzylalcohol, [ring-14C(U)]-  
2,5-Xylenol [ring-14C(U)]  
2,6-Diaminopimelic acid [carboxyl-14C]  
2,6-Diaminopyridine [2,6-14C]  
2,6-Dichloro-4-nitroaniline [14C(U)]  
2,6-Dichloroaniline [14C(U)] hydrochloride  
2,6-Dichlorobenzoic acid, [carboxyl-14C]-  
2,6-Dichlorobenzonitrile [ring-14C(U)]  
2,6-Dichlorobenzyl alcohol, [methylene-14C]-  
2,6-Dichlorophenol [14C(U)]  
2,6-Dichloropyridine [2,6-14C]  
2,6-Difluorobenzamide, [phenyl-14C(U)]-  
2,6-Difluorobenzoic acid [ring-14C(U)]  
2,6-Dihydroxy-3,4-dimethylpyridine [ring-14C(U)]  
2,6-Dihydroxybenzoic acid [1-14C]  
2,6-Diisopropylphenylsulfamate, [4-3H]-  
2,6-Dimethyl-4-nitroaniline [ring-14C(U)]  
2,6-Dimethylaniline, [ring-14C(U)]-  
2,6-Di-t-butyl-4-nitrophenol [ring-14C(U)]  
2,6-Di-t-butylphenol [ring-14C]  
2-[4-(3-Ethoxypropenyl)-phenyl]-[1,3]dioxolane, [dioxolane-2-14C]-  
2,3,4,5-Pentachlorobiphenyl  
2,3-Dideoxycytidine [2-14C]  
2,3-Dideoxyuridine [2-14C]  
2-Acetamidophenol [ring-14C(U)]  
2-Acetylthiophene [carboxyl-14C]

2-Amino-1-butanol, (R)-(-)-[1-14C]  
2-Amino-2-methyl-1-propanol [1-14C]  
2-Amino-3-hydroxypyridine [2-14C]  
2-Amino-4,6-dichloropyrimidine, [pyrimidine-5-14C]-  
2-Amino-4-methyl-5-thiazoleethanol, [2-14C]-  
2-Amino-5-chlorobenzoic acid [carboxyl-14C]  
2-Amino-5-fluorobenzoic acid [1-14C]  
2-Amino-6-fluorobenzonitrile, [nitrile-14C]-  
2-Amino-6-nitrobenzoic acid [ring-14C(U)]  
2-Aminobenzenesulfonamide [ring-14C(U)]  
2-Aminobenzyl alcohol, 2-[1-14C]  
2-Aminopyridine [2,6-14C]  
2-Anisidine [ring-14C(U)]  
2-Bromoacetamide [1-14C]  
2-Bromoethanol [1-14C]  
2-Bromoisobutyric acid [carboxyl-14C]  
2-Bromo-N-(4-methoxy-2-methylphenyl)-acetamide, [carbonyl-14C]-  
2-Bromonicotinic acid, [2-14C]-  
2-Bromopalmitic acid, [1-14C]-  
2-Bromophenol [ring-14C(U)]  
2-butoxyethyl ester  
2-Butynoic acid [1-14C]  
2-Chloro 2'-deoxyadenosine 5'-monophosphate, disodium salt, [8-14C]-  
2-Chloro 2'-deoxyadenosine, [8-14C]-  
2-Chloro-2'-deoxy-2'-fluoroarabinosyl adenine, [2-chloroadenine-8-14C]-  
2-Chloro-2'-deoxyadenosine 5'-monophosphate, [8-3H]-  
2-Chloro-4,5-difluorobenzoic acid, [carboxy-14C]-  
2-Chloro-4-methylsulfonylbenzoic acid, [ring-14C]-  
2-Chloro-4-nitroaniline [14C(U)]  
2-Chloro-5-nitroaniline [ring-14C(U)]  
2-Chloroacetamide [carbonyl-14C]  
2-Chloroadenosine [8-14C]  
2-Chlorobenzoic acid, [ring-14C]-  
2-Chlorobiphenyl [ring-14C(U)]  
2-Chloroethanesulfonyl chloride [1,2-14C]  
2-Chloroethanol [1,2-14C]  
2-Chloromethyl benzoate, [7-14C]-  
2-Chloropropanol, [1,2-14C]-  
2-Cyanoacetamide [2-14C]  
2'-Deoxy-2',2'-difluorocytidine, [cytosine-2-14C]-  
2'-Deoxyadenosine, [14C(U)]-  
2'-Deoxyadenylyl(3'->5')-thymidine, [3H]-  
2'-Deoxycytidine, [14C(U)]-  
2'-Deoxyguanosine-5'-monophosphate, [14C(U)]-  
2'-Deoxyinosine, [8-14C]-  
2'-Deoxyuridine, [14C(U)]-  
2'-Deoxyuridine-5'-monophosphate, [14C(U)]-

2-Ethyl-6-methylaniline, [ring-14C(U)]-  
2-Ethylbutyryl chloride [1-14C]  
2-Ethylhexanoic acid [1-14C]  
2-Ethylhexanol [14C]  
2-Ethyl-1-ethyl-4-methoxy-cinnamate, [ring-1-14C, ethyl-1-14C]-  
2-Fluoro-2-deoxy-D-glucose [14C(U)]  
2-Fluoro-2-deoxy-D-mannose [14C(U)]  
2-Fluoro-4-iodoaniline, [ring-14C(U)]-  
2-Fluoroaniline [14C]  
2'-Hydroxyacetophenone, [ring-14C(U)]-  
2-Iminobiotin [2-14C]  
2-Iodo-tyrosine  
2-Ketoisocaproic acid, [1-14C]-  
2-Mercaptobenzimidazole, [2-14C]-  
2-Methoxy-4-acetamido-3-chloromethylbenzoate, [carbonyl-14C]-  
2-Methoxy-4-amino-5-chlorobenzoic acid, [carbonyl-14C]-  
2-Methoxy-4-nitrobenzoic acid, [carbonyl-14C]-  
2-Methoxy-4-nitromethylbenzoate, [carbonyl-14C]-  
2-Methoxyethanol, [1-14C]-  
2-Methylalanine, [14C]  
2-Methylthioadenosine, [adenine-8-14C]-  
2-Methylthiophene [methyl- C] 14  
2'-Nitroacetanilide, [14C(U)]-  
2-Nitroaniline [14C(U)]  
2-Nitrobenzoic acid [carboxyl-14C]  
2-Nitrofluorene [9-14C]  
2-Nitromethylbenzoate, [carboxyl-14C]-  
2-Nitrophenol [14C(U)]  
2-Nitrophenylacetonitrile, [nitrile-14C]-  
2-Nitropropane, [2-14C]-  
2-Palmitoyl [1-14C] glycerol  
2-Phenylacetamido-4-carbamido butyric acid, [phenyl-14C(U)]-  
2-Propenoic acid, [1-14C]  
2-Pyrrolidone, [5-14C]-  
2-Thiouracil, [2-14C]-  
2-Toluic acid [carboxyl-14C]  
2-Toluidine  
2-Undecanone [2-14C]  
3-(4-Cyclopropyl-6-methyl-pyrimidine-2-yl-amino)-phenol, [pyrimidine-2-14C]-  
3,3',4,4',5,5'-Hexachlorobiphenyl [14C(U)]  
3,3',4,4',5-Pentachlorobiphenyl [3,4,5- phenyl ring- C(U)] 14  
3,3',4,4'-Tetrachlorobiphenyl [14C(U)]  
3,3'-Dichlorobenzidine [14C]  
3,3-Dimethylacrylic acid [1-14C]  
3,3-Dimethylallyl alcohol [1-14C]  
3,4,5-Trimethoxybenzoic acid [1-14C]  
3,4-Diaminopyridine phosphate, [2,6-14C]-

3,4-Dichlorophenol [14C(U)]  
3,4-Dihydroxybenzoic acid [carboxyl-14C]  
3,4-Dimethoxybenzoic acid [carboxyl-14C]  
3,5-Diacetylaniline, [ring-14C(U)]-  
3,5-Dibromopyridine, [2,6-14C]-  
3,5-Difluoroaniline, [14C(U)]-  
3',5'-Di-O-mesylthymidine, [2-14C]-  
3-[2-(4-Methoxyphenyl)-ethylamino]-propionic acid methyl ester, [aminomethyl-14C]-  
3-Aminopropanol [1-14C]  
3'-Azido 3'-deoxythymidine, [2-14C]-  
3-Bromobenzoic acid [7-14C]  
3-Bromophenol [ring-14C(U)]  
3-Chloro-4-cyanopyridine, [cyano-14C]-  
3-Chlorobenzoic acid, [7-14C]  
3-Cyanophenol, [7-14C]  
3'-Cyanopyridine, [cyano-14C]-  
3-Deazaadenosine, [3H]-  
3'-Deoxy 2',3'-didehydrothymidine, [4-14C]-  
3'-Deoxythymidine, [4-14C]-  
3-Dimethylaminopropylamine [1-14C] hydrochloride  
3-Ethylaniline [ring-14C(U)] hydrochloride  
3-Fluoropyridine, [2-14C]-  
3-Hydroxypicolinic acid, [carboxy-14C]-  
3-Hydroxytyramine, [8-14C]  
3-Methylbenzyl alcohol [1-14C]  
3-Methylbenzyl bromide [1-14C]  
3-Methyl-butanol [1-14C]  
3-Methylcholanthrene, [3H]-  
3-Methylfluoranthene, [3H]-  
3-Methylxanthine [8-14C]  
3-Nitroaniline [14C(U)]  
3-Nitrobenzenesulfonamide [ring-14C(U)]  
3-Nitrobenzenesulfonic acid [ring-14C(U)]  
3-Nitrobenzenesulfonyl chloride [ring-14C(U)]  
3-Nitrobenzoic acid [ring-14C(U)]  
3-Nitrobenzyl alcohol [ring-14C(U)]  
3-Nitrophenol [14C(U)]  
3-Nitrosalicylic acid [ring-14C(U)]  
3-Nitrotoluene [ring- 14C]  
3-Phenylpropionic acid, [carbonyl-14C]-  
3-pyridine carboxylic acid, [carboxyl-14C]-  
3-Toluic acid, [ring-14C(U)]-  
3-Trifluoromethoxybenzene sulfonamide, [ring-14C(U)]-  
3-Trifluoromethylphenylurea, [trifluoromethyl-14C]-  
4-(2-Aminoethyl)benzaldehyde, [ethyl-2-14C]-  
4-(3-Ethoxypropenyl) benzaldehyde, [carbonyl-14C]-  
4,4'-(Oydi-2,1-ethanediyl) bismorpholine, [morpholine-2,6-14C]-

4,6-Pyrimidine dicarboxylic acid, [2-14C]-  
4,7,10,13,16-Docosapentaenoic acid, [1-14C]-  
4,7-Dichloroquinoline, [3H]-  
4-Acetamidophenol, [ring-14C(U)]-  
4-Acetaminophen, [ring-14C(U)]-  
4-Amino-2,6-dimethoxypyrimidine, [6-methoxy-14C]-  
4-Amino-2,6-dinitrotoluene, [methyl-14C]-  
4-Aminobenzoic acid [3,5-3H]  
4-Aminobutyric acid, [4-14C]-  
4-Aminohippuric acid [glycyl-1- C] 14  
4-Aminomethylpyridine, [aminomethyl-14C]-  
4-Amino-N-(5-methyl-1,2-oazol-3-yl)benzene sulfonamide, [ring-14C(U)]-  
4-Anisidine [ring-14C(U)]  
4-Benzoylbenzoic acid, [ring-3H]-  
4-Bromo-N,N-dimethylaniline, [ring-14C(U)]-  
4-Chloroaniline, [14C(U)]-  
4-Chlorobenzoic acid, [carboxyl-14C]-  
4-Chlorophenol, [14C(U)]-  
4-Cyanobenzoic acid, [ring-14C]-  
4-Cyanobenzylbromide, [cyano-14C]-  
4-Cyproconazole, [methyl-14C]-  
4-Ethoxyaniline, sulfate, [ring-14C]-  
4-Fluoro ethylbenzoate, [carboxyl-14C]-  
4-Fluoro-3-nitromethylbenzoate, [carbonyl-14C]-  
4-Hydrazinobenzoic acid, [ring-14C]-  
4-Hydroxyquinoline, [benzene ring-14C]-  
4-Methoxyphenol, [methyl-14C]-  
4-Methoxyphenyl acetic acid, [carbonyl-14C]-  
4-Methyl-5-thiazoleethanol, [2-14C]-  
4-Methylbenzaldehyde, [carbonyl-14C]-  
4-Nitroacetanilide, [14C(U)]-  
4-Nitroiodobenzene, [2-14C]-  
4-Nitrophenol [ C(U)] 14  
4-Nitrophenylacetic acid, [carboy-14C]-  
4-Pyridinecarboxaldehyde, [carbonyl-14C]-  
4-Pyridylcarbinol N-oxide, [methylene-14C]-  
5-(2-Nitropropenyl)-benzo[1,3]dioxole, [phenyl-14C(U)]-  
5,5-Dimethyl-1-pyrroline, N-oxide, [2-14C]-  
5,7-Dihydroxy 4'-methoxyisoflavone, [6,8,3',5'-3H(N)]-  
5,8,11,14,17-Eicosanyl pentaenoic acid, [1-14C]-  
5-Aminotetrazole [5-14C]  
5-Bromopentanoic acid [1-14C]  
5-Bromouracil, [2-14C]-  
5-Bromouridine, [2-14C]-  
5-Bromovinyl-2'-deoxyuridine, [2-14C]-  
5-Carboxy-N-phenyl-2-(1H)-pyridone, [phenyl-14C(U)]-  
5-Chloro-3-phenylsulfonylindole-2-carboamide, [14C]-



5'-Deoxyadenosine, [5'-3H]  
5-Fluoro 2'-deoxyuridine 5'-monophosphate, diammonium salt, [2-14C]-  
5-Fluoro 2'-deoxyuridine, [2-14C]-  
5-Fluorouracil, [14C(U)]-  
5-Fluorouracil-β-D-arabinofuranoside, [6-3H]-  
5-Fluorouridine 5'-monophosphate, diammonium salt, [2-14C]-  
5-Iodo 2'-deoxyuridine, [6-14C]-  
5-Iodouracil, [2-14C]-  
5-Methoxy-1-methyl-1H-indole-3-carbonitrile, [nitrile-14C]-  
5-Methyl 2'-deoxycytidine, [methyl-3H]-  
5-Methyltetrahydrofolic acid, [methyl-14C]-  
5'-O-(4,4'-Dimethoxytrityl) [4,6-14C]- thymidine, 3'-(2-cyanoethyl-N,N-diisopropyl) phosphoramidite  
5'-O-(4,4'-Dimethoxytrityl) [5'-3H]- thymidine  
5-Trifluoromethyl-2'-deoxyuridine-5'-triphosphate, [6-3H]-  
5-Trifluoromethyluracil, [methyl-14C]-  
6-Chloroguanine, [8-14C]-  
6-Chloropurine, [8-14C]-  
6-Hydroxyaminopurine, [8-14C]-  
6-iodoguanine, [8-14C]-  
6-Mercaptopurine, [8-14C]-  
6-Nitro-1,2,3,4-tetrahydroisoquinolinyl-t-butylcarbonate, [14C]-  
7,10,13,16,19-Docosapentaenoic acid, [1-14C]-  
7,12-Dicarboxybenzo[k]fluoranthene, [7,12-14C]-  
8,11,14-Eicosatrienoyl CoA, [eicosatrienoic acid-1-14C]-  
8-Bromoxanthine, [8-14C]-  
9-(2-Phosphonylmethoxyethyl)-guanine, [guanine-8-14C]- (PMEG)  
9-(3-Hydroxy-2-phosphonyl-methoxypropyl)-adenine, [adenine-8-14C]-  
9,12-Octadecadienoic acid, [1-14C]-  
9,12-Octadecadienoyl CoA, [octadecadienoic acid-1-14C]-  
9-Chloroacridine, [9-14C]  
9-Hydroxycamptothecin, [12-3H(N)]-  
9-Hydroxyethyladenine, [8-14C]  
Acetaldehyde, [1,2-14C]-  
Acetamide, hydrochloride, [1-14C]-  
Acetic anhydride [1-14C]  
Acetophenone [carbonyl-14C]  
Acetyl chloride [1-14C]  
Acetyl sulfadiazine [phenyl ring-14C]  
Acetyl, N-[1-14C]  
Acetylcholine iodide [acetyl-1-14C]  
Acetyl-D-cysteine, [1-14C]-  
Acetyl-D-galactosamine, N-[1-14C]  
Acetyl-D-glucosamine, N-[1-14C]  
Acetyl-D-mannosamine, N-[1-14C]  
Acetyl-L-cysteine, [1-14C]-  
Acetylsalicylic acid [carboxyl-14C]  
Acrolein [1- 14C]

Acycloguanosine, [8-14C]-  
Acyclovir [8-3H]  
Adefovir dipivoxil, [adenine-8-14C]-  
Adenine, [14C(U)]-  
Adenosine 3',5'-cyclic phosphate, ammonium salt, [8-14C]-  
Adenosine 5'-diphosphate, triammonium salt, [8-14C]-  
Adenosine 5'-triphosphate, tetraammonium salt, [8-14C]-  
Adenosine, [2, 8-3H]  
Adenosyl-L-methionine, S-[methyl-14C]  
Adipic acid [1,6-14C]  
Aflatoxin B1, [3H (G)]  
AHTN, [phenyl-14(U)]- (mixture of isomers)  
ALBUMIN, BOVINE [125I]  
Alendronate, sodium salt, [1-14C]-  
all trans-Geranyl geraniol, [1-3H]-  
alpha-D-Glucose-1-phosphate, [14C(U)]-  
Aminobutyric acid, g-[1-14C]  
Aminoisobutyric acid, a-[1-14C]  
Aminopyrine [methyl- 14C]  
Amobarbital  
Amoxicillin [14C]  
Amprenavir, [14C]-  
Anandamide [ethanolamine-1,2-14C]  
a-Naphthol [1-14C]  
Aniline sulfate, [14C(U)]-  
Anisole [ring-14C(U)]  
Anthranilic acid methyl ester, [carbonyl-14C]-  
Antipyrine [N-methyl-14C]  
Arachidonic acid, [1-14C]  
Ara-CMP, [2-14C]-  
Asparagine, L-[14C(U)]  
Aspartic Acid, (U)14C  
Astemizole, [3H]  
Astilbin, [3H]-  
Atenolol, [ring-3H]-  
Azelaic acid [1-14C]  
Barium carbonate [14C]  
Benadryl, [phenyl-14C(U)]-  
Benzene, [14C]-  
Benzo[k]fluoranthene, [7,12-14C]-  
Benzoic 2-benzoyl-1,2-dimethylhydrazine, [methyl-14C]-  
Benzoic acid, [ring-14C(U)]-  
Benzoquinone [14C(U)]  
Benzoxazole, [phenyl ring-14C(U)]-  
Benzoyl peroxide, [carbonyl-14C]-  
Benzoyladenine, [8-14C]-  
Benzyl alcohol, [7-14C]-

Benzyl bromide, [7-14C]-  
Benzylamine hydrochloride, [7-14C]-  
Benzylchloride, [ring-14C(U)]-  
Benzyltrimethylammonium chloride, [benzyl-14C]-  
Benzylpenicillin [benzyl-14C] potassium  
Betaine, [methyl-14C]-  
Bevirimat, [3H]-  
Bicyclo[3.2.1]octan-2,4-dione, [2,4-14C]-  
Biochanin A, [4-14C]-  
Bis(2-chloro-1-methylethyl)ether, [ethyl-2-14C]-  
Bis(trimethylsilyl)acetylene, [acetylene-14C(U)]-  
Bisphenol A [ring-14C(U)]  
Brilliant Blue FCF, [aniline-14C(U)]-  
Bromoacetic acid [1-14C]  
Bromobenzene [14C(U)]  
Bromonitromethane, [14C]-  
Bromopyruvic acid, [2-14C]-  
Butanol, n-[1-14C]  
Butylamine, t-[1-14C]- hydrochloride  
Butyric acid, n-[1-14C] sodium salt  
Caffeine, [1-methyl-14C]-  
Calcium carbide [14C]  
Calcium carbonate, [14C]-  
Caproic acid, [carboxyl-14C]  
Carboethoxymethylenetriphenylphosphorane, [2-14C]-  
Carnitine L-[N-methyl 14C] hydrochloride  
CdAP, [8-3H]-  
Cellobiose, [3H]-  
Cellulose [14C(U)] (*Nicotiana tobacum*)  
Cetyl alcohol, [1-14C]-  
Cetylpyridinium chloride, [2-14C]-  
Chinomethinate, [quinoxaline-2,3-14C]-  
Chlordecone, [14C]-  
Chloro(2)nicotinic acid, [2-14C]-  
Chloroacetic acid [1-14C]  
Chloroacetylchloride, [1-14C]-  
Chloroethyltrimethylammonium chloride, [ethyl-2-14C]-  
Chloromethyl acetate, [chloromethyl-14C]-  
Chloroneb, [ring-14C(U)]-  
Cholestenone, [4-14C]-  
Cholesteryl arachidonate, [3H]-  
Cholic acid [carboxyl-14C]  
Choline chloride [methyl-14C]  
Ciprofloxacin, [2-14C]-  
cis,trans-4-Acetamidocyclohexanol, [14C(U)]-  
cis,trans-Dichloroethylene, [1,2-14C]-  
cis-13-Docosenoic acid, [3H]-

cis-Dichloroethylene, [1,2-14C]-  
Citric acid, [1,5-14C]-  
CLA, [linoleic acid-1-14C]-  
Cladribine, [8-14C]-  
Clarithromycin, [6-O-methyl-14C]-  
Clenbuterol, [3H]-  
Clofarabine, [2-chloroadenine-8-14C]-  
Clomazone, [oazolidin-14C]-  
Clozapine, [chlorophenyl-14C(U)]-  
CMIT, [4,5-14C]-  
Copper cyanide, [14C]-  
Creatine hydrate, [4-14C]-  
Cyanamide [14C]  
Cyanoacetic acid, [14C(U)]-  
Cyanoguanidine, [14C(U)]-  
Cyclohexanecarboxylic acid, [carboxy-14C]-  
Cyclopentyl alcohol, [1-14C]-  
Cyclopropane carboxylic acid, [carboxyl-14C]-  
Cytidine 5'-monophosphate sialic acid  
Cytidine 5'-diphosphochloine, disodium salt, [5-3H]-  
Cytidine 5'-monophosphate, diammonium salt, [cytosine-14C(U)]-  
Cytidine 5'-triphosphate, tetraammonium salt, [2-14C]-  
Cytidine monophosphate, diammonium salt, [14C(U)]-  
Cytidine, [cytosine-14C(U)]-  
Cytosine, [2-14C]-  
D,L-Leucine, [1-14C]-  
D4, [methyl-14C]-  
D4T, [2-14C]-  
D5, [methyl-14C]-  
D6, [methyl-14C]-  
D-Alanine, [1-14C]-  
D-Alanyl-D-alanine, [2,3-3H]-  
D-Arabinose, [1-14C]-  
D-Arginine, [1-14C]-  
d-Biotin, [thieno[3,4-d]imidazo-carbonyl-14C]-  
DCIP, [ethyl-2-14C]-  
D-Cysteine, [1-14C]-  
Decamethylcyclopentasiloxane, [methyl-14C]-  
Decane, [1-14C]-  
Decanoic acid, [1-14C]-  
Decanoyl CoA, [decanoic acid-1-14C]-  
Decoquinatate, [quinoline-3-14C]-  
Deoxy-D-glucose, 2-[1-14C]  
Dextran [carboxyl-14C]  
Dextran carboxyl, [carboxyl-14C]-  
Dextran sulfate, [carboxyl-14C]-  
Dextran, [methyl-14C]-

D-Fructose, [14C(U)]-  
D-Fructose-6-phosphate, disodium salt, [14C(U)]-  
D-Galactose, [1-14C]-  
D-Glutamic acid, [3H]-  
Di(ethylene glycol) ethyl ether, [4-14C]-  
Diazinon, [pyrimidine-6-14C]-  
Dibutyl maleate, [maleate-1,4-14C]-  
Dichloroacetic acid [1-14C]  
Diethyl glutarate, [1,5-14C]-  
Diethyl malonate [2-14C]  
Diethyl oxalate [14C]  
Diethyleneglycol ditosylate, [1-14C]-  
Diethylmaleate, [2,4-14C]-  
Diethylstilbestrol, [3H]-  
Diflubenzuron, [difluorobenzoyl ring-14C(U)]-  
Dihydroazacytidine, [4-14C]-  
Dihydrofolic acid, [3', 5', 7, 9-3H]  
Dihydrotestosterone [4-14C]  
Dihydrouracil, [2-14C]-  
Dihydroxyphenylethylamine, 3,4-[8-14C]  
Dihydrozeatin, [2-methylbutanol-2,3-3H]-  
Diiodomethane [14C]  
Diiodomethyl-p-tolylsulfone, [ring-14C]-  
Dimecron, [1,3-14C]-  
Dimethyloxazolidine-2,4-dione-5,5-[2-14C]  
Dimethylsulfide [14C]  
Diphenhydramine HCl, [phenyl-14C(U)]-  
Di-t-butylcarbonate, [carbonyl-14C]-  
Dithiobisbenzanilide, [phenyl-14C(U)]-  
DL-Ornithine hydrochloride, [1-14C]-  
D-Lyxose, [1-14C]-  
D-Mannitol, [1-14C]-  
D-Mannosamine hydrochloride, [1-14C]-  
D-Methionine, [1-14C]-  
Docetaxel, [tert-butyl-14C]-  
Docosanoic acid, [1-14C]-  
Docosanoyl CoA, [docosanoic acid, [1-14C]-  
Dodecamethylcyclohexasiloxane, [methyl-14C]-  
Dodecanedioic acid, [1-14C]-  
Dodecanoic acid, [1-14C]-  
Dodecanoyl CoA, [dodecanoic acid-1-14C]-  
Dodecyltrimethylammonium bromide, [14C]-  
Dopamine, [7, 8-3H (N)]  
D-Phenylalanine, [ring-14C(U)]-  
D-Ribavirin, [5-14C]-  
D-Ribose, [1-14C]-  
D-Tryptophan, [3-14C]-

D-Tryptophan, [phenyl-14C(U)]-  
D-Valine, [1-14C]-  
D-Xylose, [1-14C]-  
Efavirenz, [carbonyl-14C]-  
Eicosanoic acid, [1-14C]-  
Eicosapentaenoic acid 5,8,11,14,17 [1-14C]  
Emtricitabine, [2-14C]-  
Enrofloxacin, [quinoline-2-14C]-  
Epichlorohydrin, [2-14C]-  
Epithalon, [alanine-14C(U)]-  
Erucic acid [1-14C]  
Esculetin, [benzene ring-14C]-  
Ethanol [2-14C]  
Ethanolamine, [1-14C]-  
Ethepon, [2-chloroethyl-14C(U)]-  
Ethoprop, [1,1'-14C2]-  
Ethyl bromoacetate [1-14C]  
Ethyl nicotinate, [carboxyl-14C]-  
Ethyl-2-bromoisobutyrate, [carbonyl-14C]-  
Ethyl-5-oxohexanoate, [1-14C]-  
Ethylene glycol methyl ether, [1-14C]-  
Ethylene glycol, [1,2-14C]-  
Ethyleneglycol monoethyl ether, [1-14C]-  
Etoposide, [ethylidene-1-14C]-  
Eugenol, [ring-14C(U)]-  
Flavone, [6-3H]-  
Flucarbaxone, [phenyl-14C(U)]-  
Fluor(9)enone-4-carboxylic acid, [9-14C, carboxyl-14C]-  
Fluroxypyr-1-methylheptyl ester, [methylene-14C]-  
Forchlorfenuron, [pyridine-2,6-14C]-  
Formaldehyde, [14C]-  
Formic acid, free acid, [14C]-  
Fumaric acid, [2,3-14C]-  
GABA, [4-14C]-  
Ganciclovir, [8-14C]-  
Gemcitabine, [cytosine-2-14C]-  
Glucuronic acid, D-[6-14C]  
Glutaraldehyde, [1,5-14C]-  
Glutaryl [1,5- 14C] Coenzyme A  
GLUTATHIONE  
Glyceraldehyde, [1-14C]-  
Glycerol trilaurate [1-14C]  
Glycine [1-14C] ethyl ester hydrochloride  
Glycine, [1-14C]  
Glycocholic acid [glycine 1-14C]  
Glycolic acid [1,2-14C] calcium salt  
Glycyl [1-14C]

Glycylalendronic acid, sodium salt, [alendronate-4-14C]-  
Glycyl-L-glutamine, [3H]-  
Glyoxime [14C(U)]  
Glyoxylic acid [14C(U)] sodium salt  
Glyphosate [glycine-2-14C]  
Gramine, [ $\alpha$ -14C]  
GROWTH HORMONE (HUMAN), [125I]-  
Guanidine [ C(U)] hydrochloride 14  
Guanidine hydrochloride, [14C]-  
Guanidinoacetic acid, [1-14C]-  
Guanine, [8-3H]  
HDP-CDV, sodium salt, [cytosine-2-14C]-  
Heptachlor [14C]  
Heptane, [1,2-3H]-  
Heptanoic acid [1-14C] sodium salt  
Hexadecane [1,2-14C]  
Hexadecanedioic acid [16-14C]  
Hexadecatrienoyl [1- 14C] Coenzyme A  
Hexadecylhexadecanoate [carbonyl-14C]  
Hexadecyloxypropyl cidofovir, sodium salt, [cytosine-2-14C]-  
Hexadecyltrimethyl ammonium iodide  
Hexadecynoic acid, [1-14C]-  
Hexaflumuron, [dichlorophenyl-14C(U)]-  
Hexamidine, dihydrochloride salt, [11,16-14C]-  
Hexane, n-[1-14C]  
Hexanoic acid, n-[1-14C] sodium salt  
Hexanol, n-[1-14C]  
Hexanoyl [1-14C] Coenzyme A  
Hexyl bromide, [1-14C]  
Hippuric acid, [glycyl-1-14C]-  
Histamine, dihydrochloride salt, [7-3H (N)]  
Histidine, L-[14C(U)]  
HMDP  
HPMPA, [adenine-8-14C]-  
Hyaluronic acid, [3H]-  
Hydrazinecarbothioamide, [14C]  
Hydrocortisone [4-14C]  
Hydroquinone [14C(U)]  
Hydroxyflutamide, [3H]-  
Hydroxytryptamine binoxalate, 5-[2-14C]  
Imazalil, [dichlorophenyl ring-14C(U)]-  
Imidazole, [2-14C]-  
Indole-3-acetic acid [1-14C]  
Inositol, D-[14C(U)] 1-phosphate  
Inulin carboxyl [carboxyl-14C]  
Inulin methoxy, [methoxy-14C]-  
Iodoacetamide [1-14C]

Iodoacetic acid [1-14C]  
Iodoantipyrine, 4-[N-methyl-14C]  
Iodoform [14C]  
Iloynil octanoate, [ring-14C(U)]-  
Iloynil, [ring-14C(U)]-  
Iperoxo, [methyl-3H]-  
Iressa, [3H]-  
Irgarol, [ring-14C(U)]-  
Isobutyric acid [carboxyl-14C] sodium salt  
Isobutyric acid, [1-14C]-  
Isoeugenol, [ring-14C(U)]-  
Isonicotinic acid [1-14C]  
Isonicotinic acid N-oxide, [carboxy-14C]-  
Isonicotinic acid, [carboxyl-14C]-  
Isoorotic acid, [carbonyl-14C]-  
Isophthalic acid, [ring-14C(U)]-  
Isopropanol, [2-14C]-  
Isopropyl myristate, [1-14C]-  
Kaempferide, [6,8,3',5'-3H(N)]-  
Lactose, [D-glucose-14C(U)]-  
L-Alanine L-alanine [1-14C]  
L-Alanine L-alanine L-alanine [1-14C]  
L-Alanine methyl ester, hydrochloride, [1-14C]-  
L-Alanine-L-alanine-L-alanine-L-alanine [1-14C]  
L-alpha-Methyl tryptophan, [side chain-3-14C]-  
Lapatinib, [3H]-  
L-Arabinose, [1-14C]-  
L-Arginine, [guanido-14C]-  
L-Aspartic acid, [14C(U)]-  
Latanoprost, [15-3H]  
Lauric acid [1-14C]  
Lauric acid [1-14C]-  
Lauroyl [1-14C] Coenzyme A  
Lauroyl isethionate, sodium salt, [isethionate-14C]-  
Lauryl isethionate, sodium salt, [lauryl-1-14C]-  
L-Carnitine, hydrochloride, [N-methyl-14C]-  
L-Cysteine, [1-14C]-  
Lignoceric acid [1-14C]  
Linolenic acid, [1-14C]-  
L-Lysine, [14C(U)]-  
L-Methionine  
L-N-Acetyl-(m-bis-hydroxyethylamino)-phenylalanine methyl ester, [3H]-  
L-Norleucine, [1-14C]-  
Lobucavir, [3H]-  
Lopinavir, [14C]-  
L-Phenylalanine, [14C(U)]-  
L-Proline, [14C(U)]-



L-Rhamnose, [3H(G)]  
L-Ribose, [1-14C]-  
L-Serine, [14C(U)]-  
L-Threonine, [14C(U)]-  
L-Thymidine, [2-14C]-  
L-Tryptophan, [phenyl-14C(U)]-  
Luciferin, [benzene-14C(U)]-  
Luteolin, [6,8-3H(N)]-  
L-Valine, [1-14C]-  
Maleic acid, [1-14C]-  
Maleic anhydride [2,3-14C]-  
Malonic acid [2-14C]  
Malonyl Coenzyme A, [malonyl-2-14C]-  
m-Aminophenol, hydrochloride, [ring-14C(U)]-  
Mannosamine, D-[1-14C] hydrochloride  
Mannose, D-[1-14C]  
Mequitazine, [2-14C]-  
Mercaptoacetic acid, [1-14C]  
meta-Toluic acid, [ring-14C(U)]-  
Metformin, hydrochloride, [biguanidine-14C]-  
Methanol [14C]  
Methoxychlor, [ring-14C]-  
Methyl [14C] b-D-thiogalactopyranoside  
Methyl iodide [14C]  
Methyl Isothiocyanate, [cyano-14C]-  
Methyl-4-phenylpyridinium iodide 1-[methyl-14C]  
Methylamine [14C] hydrochloride  
Methylaminoisobutyric acid, a-[1-14C]  
Methyl-t-butyl ether, [14C(U)]-  
Methyltriphenylphosphonium iodide [methyl-14C]  
Methyl- $\alpha$ -D-glucopyranoside, [methyl-14C]-  
Metolachlor, [ring-14C(U)]-  
Metribuzin, [triazine-5-14C]-  
Molinate, [heahydroazepine-2-14C]-  
Muconaldehyde, [2,5-14C]-  
Myosmine, [pyridine-5-3H]-  
Myristic acid [1-14C]  
Myristoyl Coenzyme A, [myristoyl-1-14C]-  
N-(2-Aminoethyl)ethanolamine, [14C(U)]-  
N-(4-Bromophenyl) acetamide, [phenyl-14C(U)]-  
N,N,N-Trimethyl glycine, [methyl-14C]-  
N,N-Bis-(1,12-dodecyl)-picolinium bromide, [methyl-14C]-  
N,N-Bis(2-hydroxyethyl)-p-phenylenediamine, [ring-14C(U)]-  
N,N-Dimethylglycine, [methyl-14C]-  
N,N'-Diphenyloxamide, [ring-14C]-  
N-1,3-Dimethylbutyl-N'-phenyl-p-phenylenediamine, [butyl-1-14C]-  
N6-Benzyladenine, [benzyl ring-14C(U)]-

N-Acetoxyphthalimide, [methyl-3H]-  
N-Acetyl isonipecotic acid, [carboxyl-14C]-  
N-Acetyl-D,L-Norleucine, [1-14C]-  
N-Acetyl-D-glucosamine, [glucosamine-1-14C]-  
N-Acetyl-D-mannosamine, [acetyl-1-14C]-  
N-Acetyl-D-methionine, [carboxyl-14C]-  
N-Acetyl-D-phenylalanine, [1-14C]-  
N-Acetylretigabine, [aniline-14C(U)]-  
Naphthalene, [1,4,6,9-14C]-  
N-Benzoylglycine, [glycyl-1-14C]-  
n-Butylglycidyl ether, [butoxy-1-14C]-  
N-Carbamyl-D,L-aspartic acid, [carbamyl-14C]-  
N-Carbamyl-β-alanine, [carbamyl-14C]-  
Nepafenac, [aniline-14C(U)]-  
N-FMOC-L-leucine, [14C(U)]-  
Niacin mononucleotide, [carboxyl-14C]-  
Niacin riboside, [carboxyl-14C]-  
Nicotinamide, [carbonyl-14C]-  
Nicotinic acid, [carboxyl-14C]-  
Nitro(3)benzoic acid, [carboxyl-14C]-  
Nitrobenzene [14C(U)]  
Nitroimidazole, [2-14C]-  
Nitrosodimethylamine, [methyl-14C]-  
N'-Nitrosonornicotine, [pyridyl-5-3H]-  
Nonanoic acid, [carboxyl-14C]-  
Norastemizole, [2-14C]-  
N-Palmitoyl-D-sphingosine, [palmitoyl-1-14C]-  
N-t-BOC-Glycylalendronic acid, sodium salt, [alendronate-4-14C]-  
N-t-Butyl-α-phenylnitron, [methylene-14C]-  
o-Cresol, [ring-14C(U)]-  
Octamethylcyclotetrasiloxane, [methyl-14C]-  
Octanoic acid [1-14C] sodium salt  
Octanoyl Coenzyme A, [octanyl-1-14C]-  
ODBG-(S)-HPMPA, [adenine-8-14C]-  
Oleic acid [1-14C]  
Oleoyl alcohol, [oleoyl-1-14C]-  
Oleoyl Coenzyme A, [oleoyl-1-14C]-  
Olmelin, [6,8,3',5'-3H(N)]-  
o-Nitroaniline, [14C(U)]-  
o-Nitromethylbenzoate, [ring-14C(U)]-  
Ornithine, L-[1-14C]  
ortho-Toluic acid, [carboxyl-14C]-  
o-Toluic acid, [carboxyl-14C]-  
Oxalic acid [14C(U)]  
Oxaliplatin, [cyclohexane ring-14C]-  
Oxalyl dimethylester, [1,2-14C]-  
o-Xylene, [methyl-3H]-

P1-P3-Diadenosine triphosphate, [3H]-  
Paclitaxel, [benzoyloxy ring-14C(U)]-  
Palmitic acid [1-14C]  
Palmitoyl ethanolamide, [9,10-3H]-  
Paraformaldehyde, [14C]-  
para-Toluic acid, [carboxy-14C]-  
Pefurazoate, [methylfuran-14C]-  
Pentanedione, [2,4-14C]-  
Pentanoic acid [1-14C] sodium salt  
p-Fluorobenzoic acid, [7-14C]-  
p-Fluorobenzylalcohol, [7-14C]-  
p-Fluorophenol, [14C(U)]-  
Phenanthrene [9-14C]  
Phenol, [14C(U)]-  
Phenylacetic acid, [acetate-1,2-14C]-  
Phenylboronic acid, [ring-14C]-  
Phenylbutyric acid, [phenyl-14C(U)]-  
Phenylethylamine, b-[ethyl-1-14C] hydrochloride  
Phenylhydrazine, hydrochloride, [14C(U)]-  
Phosgene, [14C]-  
Phthalic acid, [1,2-carboxy-14C]-  
Picloram, [3,4,5,6-14C]-  
Picolinic acid [carboxy-14C]  
Pimelic acid [1,7-14C]  
Pipelic Acid [carboxyl-14C]  
Pirfenidone, [benzene ring-14C(U)]-  
PMEA, [adenine-8-14C]-  
PMEG, [guanine-8-14C]-  
p-Nitroaniline, [14C(U)]-  
Potassium cyanate, [14C]-  
Potassium lauryl hydroamate, [1-14C]-  
Potassium octyl hydroamate, [1-14C]-  
Potassium thiocyanate [14C]  
Praziquantel, [cyclohexylcarbonyl-14C]-  
Prochloraz, [phenyl-14C(U)]-  
Propionic acid, sodium salt, [1-14C]-  
Propionyl Coenzyme A, [1-14C]-  
Putrescine [1,4-14C] dihydrochloride  
Pyrazole carboxamide hydrochloride, [carboxamide-14C]-  
Pyrene, [4,5,9,10-14C]-  
Pyridine sulfate, [2,6-14C]-  
Pyridinemethanol N-oxide, [methylene-14C]-  
Pyrimidine hydrochloride, [2-14C]-  
Quinoxaline, [14C]-  
Raloxifene, [3H]-  
Resorcinol [14C(U)]  
Ribitol, D-[1-14C]

Saccharin, [ring-14C(U)]- (sodium salt)  
Shikimic acid [3-3H]  
Sodium carbonate, [14C]  
Sodium cyanide [14C]  
Sodium isobutyrate, [1-14C]-  
Sodium-4-methyl-2-oxopentanoate, [1-14C]-  
Sorbitol, D-[14C(U)]  
Spectinomycin, [14C]-  
β-D-Ribamidine, [5-14C]-  
Stearic acid [1-14C]  
Stearoyl Coenzyme A, [stearic acid-1-14C]-  
Stearyl isethionate, [stearyl-1-14C]-  
Succinic acid [2,3-14C]  
Succinic anhydride, [2,3-14C2]-  
Tartrazine, [phenyl-14C(U)]-  
Taxol C, [3H]-  
Taxotere, [tert-butyl-14C]-  
t-Butyl alcohol, [14C(U)]-  
Tenofovir [adenine-8-14C]  
Tenofovir disoproxil, [adenine-8-14C]-  
Terbinafine [14C] hydrochloride  
Tetracaine, [carbonyl-14C]-  
Tetrahydrofurfuryl alcohol, [2-14C]-  
Theophylline [8-14C]  
Thiabendazole, [benzene-14C(U)]-  
Thiamphenicol, [ring-14C(U)]-  
Thiourea [14C]  
Thymidine 5'-diphosphate, [2-14C]-  
Thymidine 5'-monophosphate, diammonium salt, [2-14C]-  
Thymidine 5'-triphosphate, [2-14C]-  
Thymine, [2,6-14C]-  
trans-(S,S)-1,2-Diaminocyclohexane, dihydrochloride, [14C(U)]-  
trans-Dichloroethylene, [1,2-14C]-  
Trichloroacetic acid [1-14C]  
Triclocarban, [chlorophenyl ring-14C(U)]-  
Triclosan, [2,4-dichlorophenyl-14C(U)]-  
Tridecane, [1,13-14C]-  
Triethylorthoformate, [formate-14C]-  
Trimethoprim, [pyrimidine-4-14C]-  
Trimethylamine hydrochloride [14C]  
Trimethylsilyl cyanide, [cyano-14C]-  
Triphenylphosphate [14C(U)]  
Triphenylphosphine, [3H]-  
Tris-(1,3-dichloro-2-propyl)phosphate, [1-3-14C]-  
Tris(4-chlorophenyl)methanol, [14C(U)]-  
Tris(chloroisopropyl)phosphate, [propyl-1,2-14C]-  
Tri-tert-butylphenol, [ring-14C]-

Tryptamine bisuccinate [side chain-2-14C]  
Tyrosine, L-[14C(U)]  
Ubiquitin [125I]  
Uracil, [6-3H]-  
Uracil- $\beta$ -D-arabinofuranoside, [2-14C]-  
Urea, [14C]-  
Uric acid [8-14C]  
Uridine 5'-monophosphate, diammonium salt, [14C(U)]-  
Uridine 5'-triphosphate, tetraammonium salt, [2-14C]-  
Uridine diphosphate glucuronic acid  
Uridine diphosphate-D-glucose, [D-glucose-14C(U)]-  
Uridine, [uracil-14C(U)]-  
Valproic acid [carboxyl-14C] sodium salt  
Vanillin [carbonyl-14C]  
Viramidine, [5-14C]-  
Virazole, [5-14C]-  
VP-16-213, [ethylidene-1-14C]-  
Xanthine, [8-14C]-  
Z-D,L-Serine, [3-14C]-  
Zebularine, [2-14C]-  
 $\alpha$ -Ketoglutaric acid, sodium salt, [5-14C]-ionic  
acid-1-14C]-
